# Supplementary material
Source: PubMed Central journal article supplement (PMC2441546)
Supplement: M802275200_1.pdf [file M802275200_1.pdf]

## Supplementary Figure 1

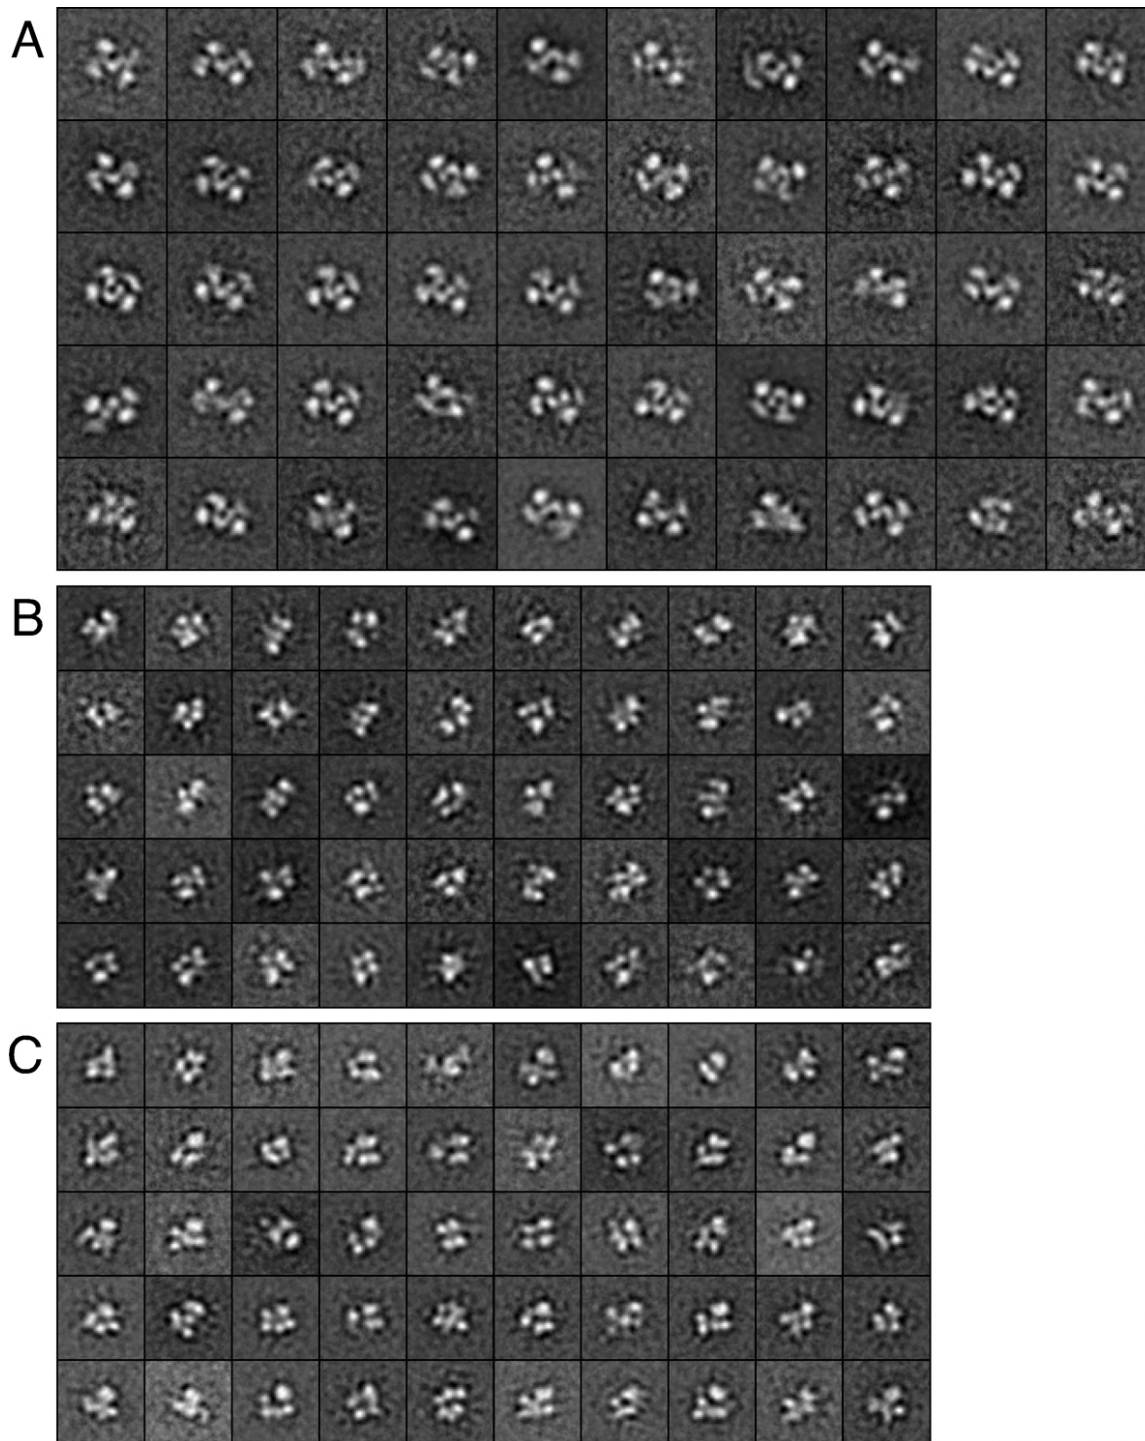

SUPPLEMENTARY FIGURE 1. **Class averages of negatively stained wild type FXI, FXI/C321S/K331A and PK.** Panels A-C: The 50 class averages obtained from classification of 4,269 particle images of negatively stained wild-type FXI (panel A), 4,150 particle images of negatively stained FXI/C321SK331A (panel B), and 4,601 particle images of negatively stained PK (panel C). The side length of the individual class averages is 29 nm in panel A and 22.5 nm in panels B and C.
